# Supplementary material
Source: publisher figshare collection journal article supplement (https://acs.figshare.com/ndownloader/files/11973509)
Supplement: Supplementary file 1 [file 11973509]

## Supporting Information

### **3-Substituted 1,5-Diaryl-1*H*-1,2,4-triazoles as Prospective PET Radioligands for Imaging Brain COX-1 in Monkey. Part 2: Selection and Evaluation of [<sup>11</sup>C]PS13 for Quantitative Imaging**

Stal Shrestha,<sup>†</sup> Prachi Singh,<sup>†</sup> Michelle Y. Cortes-Salva,<sup>†</sup> Kimberly J. Jenko,<sup>†</sup> Masamichi Ikawa,<sup>†</sup> Min-Jeong Kim,<sup>†</sup> Masato Kobayashi,<sup>†</sup> Cheryl L. Morse,<sup>†</sup> Robert L. Gladding,<sup>†</sup> Jeih-San Liow,<sup>†</sup> Sami S. Zoghbi,<sup>†</sup> Masahiro Fujita,<sup>†</sup> Robert B. Innis<sup>†</sup> and Victor W. Pike<sup>†\*</sup>

<sup>†</sup>Molecular Imaging Branch, National Institute of Mental Health, National Institutes of Health, Building 10, Room B3 C346A, 10 Center Drive, Bethesda, Maryland 20892, United States

## Contents

**Figure S1.** PET images of brain radioactivity (SUV) in normal rhesus monkey after intravenous injection of [ $^2\text{H}_2$ ,  $^{18}\text{F}$ ]PS2 (top row). The images show undesirable radioactivity uptake in skull. The bottom row shows the MRI. S3

**Figure S2.** Time courses of parent radioligand concentration in monkey arterial plasma for [ $^{11}\text{C}$ ]PS1, [ $^2\text{H}_2$ ,  $^{18}\text{F}$ ]PS2, and [ $^{11}\text{C}$ ]PS13. Plasma curves were fitted as a triexponential. The inset shows the data up to about 5 min. S3

**Figure S3.** Regional  $V_T$  for (panel A) and  $V_T/f_P$  (panel B) for [ $^{11}\text{C}$ ]PS13 in one Rhesus monkey at baseline and under self-block condition (1 mg/kg, i.v.); regional  $V_T$  (panel C) and  $V_T/f_P$  (panel D) for [ $^{11}\text{C}$ ]PS13 in another monkey at baseline and under pre-block with KTP-Me (3 mg/kg, i.v.); regional  $V_T$  (panel E) and  $V_T/f_P$  (panel F) for [ $^{11}\text{C}$ ]PS13 in another monkey at baseline and after pre-administration of MC1 (0.3 mg/kg, i.v.). S4

**Table S1.** Regional  $V_T$  for [ $^{11}\text{C}$ ]PS13 in rhesus monkeys before (baseline) and after self-treatments (i.v.) with 1) PS13 (1 mg/kg), 2) KTP-Me (3 mg/kg); and 3) MC1 (0.3 mg/kg). S5

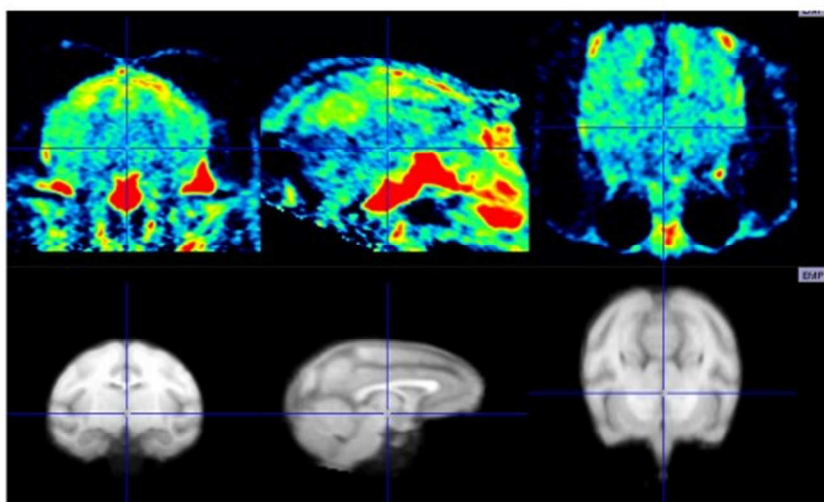

**Figure S1.** PET images of brain radioactivity (SUV) in normal rhesus monkey after intravenous injection of [ $^2\text{H}_2$ ,  $^{18}\text{F}$ ]PS2 (top row). The images show undesirable radioactivity uptake in skull. The bottom row shows the MRI.

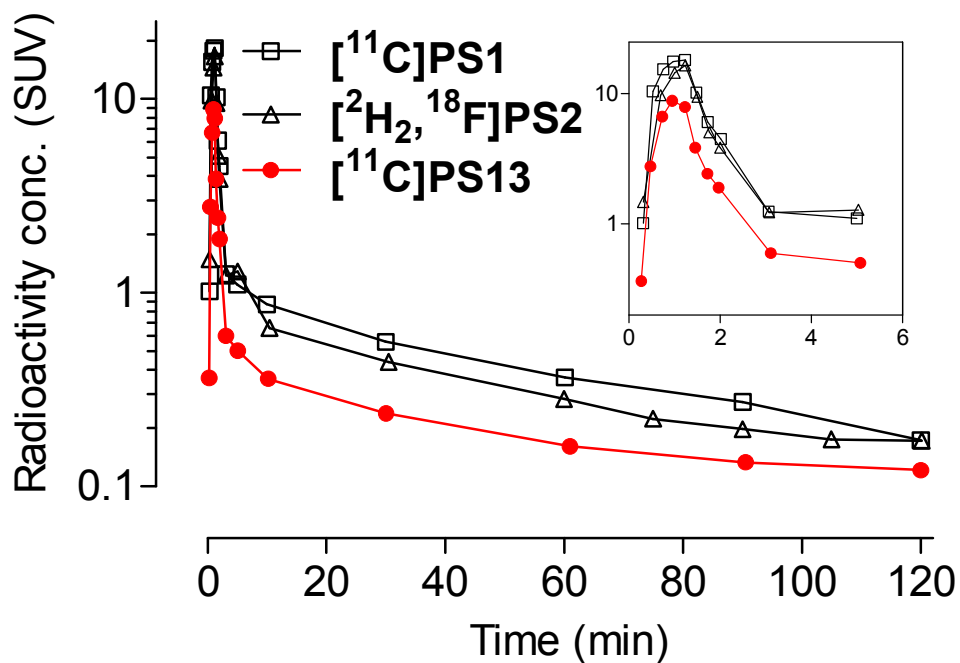

**Figure S2.** Time courses of parent radioligand concentration in monkey arterial plasma for [ $^{11}\text{C}$ ]PS1, [ $^2\text{H}_2$ ,  $^{18}\text{F}$ ]PS2, and [ $^{11}\text{C}$ ]PS13. Plasma curves were fitted as a triexponential. The inset shows the data up to about 5 min.

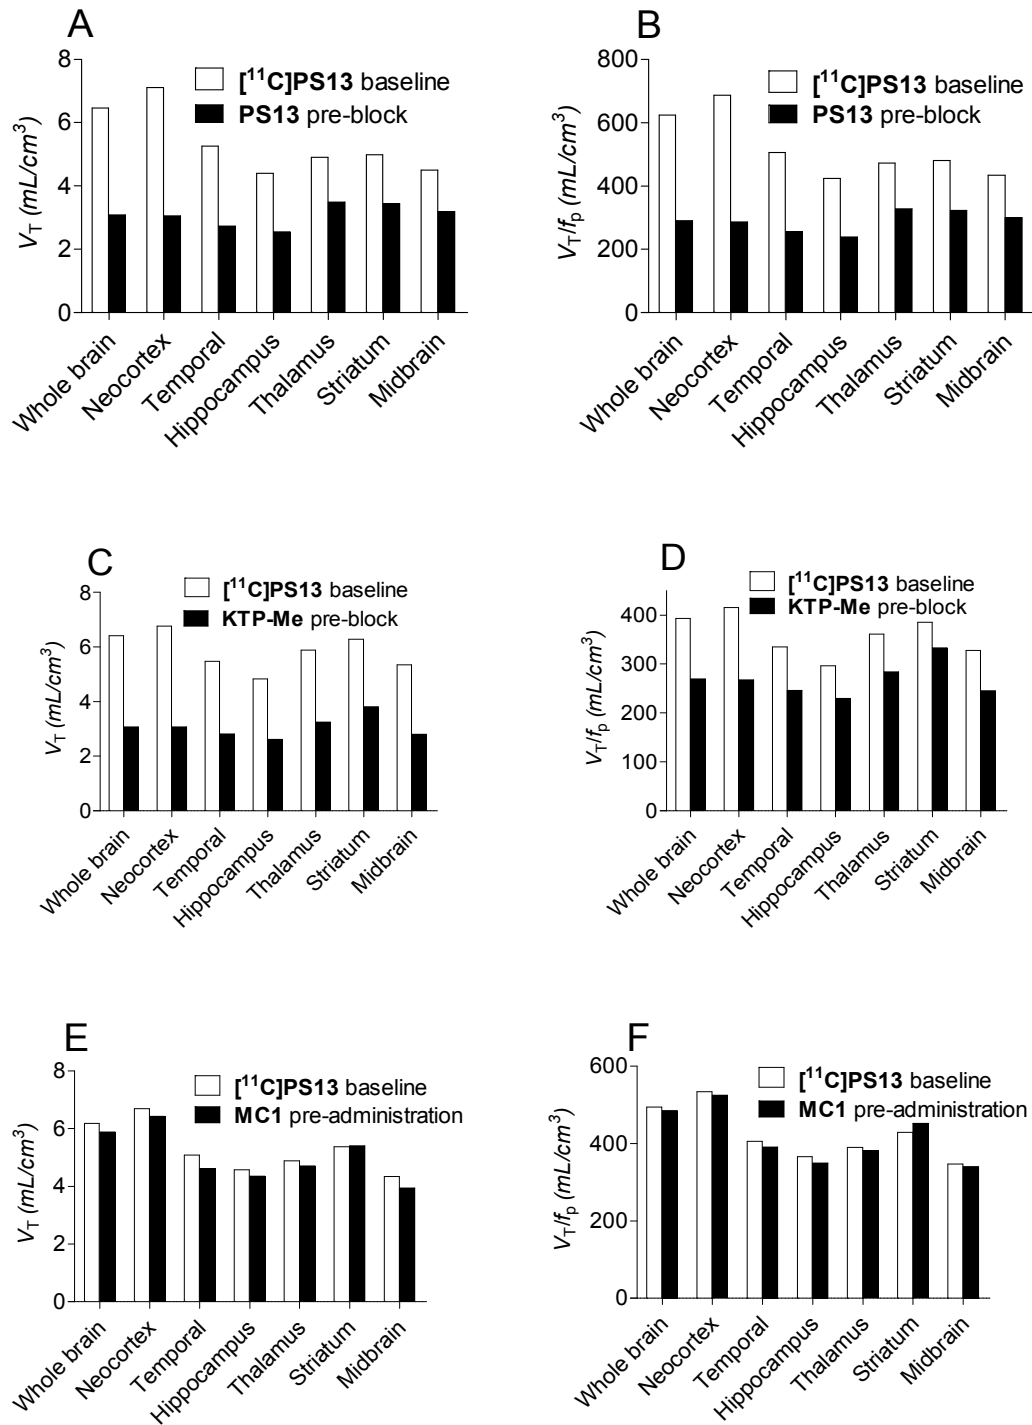

**Figure S3.** Regional  $V_T$  for (panel A) and  $V_T/f_p$  (panel B) for  $[^{11}\text{C}]\text{PS13}$  in one rhesus monkey at baseline and under self-block condition (1 mg/kg, i.v.); regional  $V_T$  (panel C) and  $V_T/f_p$  (panel D) for  $[^{11}\text{C}]\text{PS13}$  in another monkey at baseline and under pre-block with **KTP-Me** (3 mg/kg, i.v.); regional  $V_T$  (panel E) and  $V_T/f_p$  (panel F) for  $[^{11}\text{C}]\text{PS13}$  in another monkey at baseline and after pre-administration of **MC1** (0.3 mg/kg, i.v.).

**Table S1.** Regional  $V_T$  for [ $^{11}\text{C}$ ]PS13 in rhesus monkeys before (baseline) and after self-treatments (i.v.) with 1) PS13 (1 mg/kg), 2) KTP-Me (3 mg/kg); and 3) MC1 (0.3 mg/kg).

| Regions     | $V_T$ (mL/cm <sup>3</sup> ) |   |      |                |      |                |        |                |      |
|-------------|-----------------------------|---|------|----------------|------|----------------|--------|----------------|------|
|             | <i>Baselines</i>            |   |      | <i>Study 1</i> |      | <i>Study 2</i> |        | <i>Study 3</i> |      |
|             | mean                        |   | SD   | Baseline       | PS13 | Baseline       | KTP-Me | Baseline       | MC1  |
| Whole brain | 6.45                        | ± | 0.24 | 6.76           | 3.09 | 6.41           | 3.07   | 6.18           | 5.88 |
| Neocortex   | 6.97                        | ± | 0.34 | 7.44           | 3.13 | 6.77           | 3.07   | 6.69           | 6.42 |
| Temporal    | 5.33                        | ± | 0.18 | 5.43           | 3.04 | 5.47           | 2.82   | 5.08           | 4.61 |
| Hippocampus | 4.59                        | ± | 0.19 | 4.37           | 2.54 | 4.83           | 2.62   | 4.58           | 4.35 |
| Thalamus    | 5.22                        | ± | 0.48 | 4.88           | 3.49 | 5.89           | 3.25   | 4.88           | 4.71 |
| Striatum    | 5.59                        | ± | 0.50 | 5.11           | 3.21 | 6.28           | 3.81   | 5.37           | 5.40 |
| Midbrain    | 4.73                        | ± | 0.44 | 4.49           | 3.19 | 5.35           | 2.80   | 4.34           | 3.94 |
